# Supplementary material for: Therapeutic Effects of Dipterocarpus tuberculatus with High Antioxidative Activity Against UV-Induced Photoaging of NHDF Cells and Nude Mice
Source: MDPI journal article supplement (doi:10.3390/antiox10050791), 2021-05-17
Supplement: s1 [file s1]

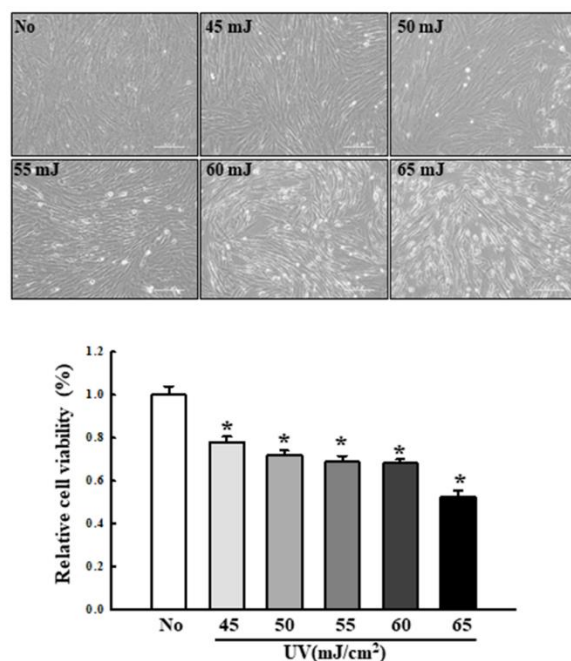

**Figure S1.** Determination of optimal UV dosage. NHDF cells were exposed with five different doses of UVB (45, 50, 55, 60 and 65 mJ/cm<sup>2</sup>), and the morphological changes of cells were observed under a microscope at 400× magnification. The viability of these cells was determined with MTT assay. Two to three wells per group were used in the MTT assay, and optical density was measured in duplicates. Data are reported as the means ± SD. \*,  $p < 0.05$  relative to the No treated group.

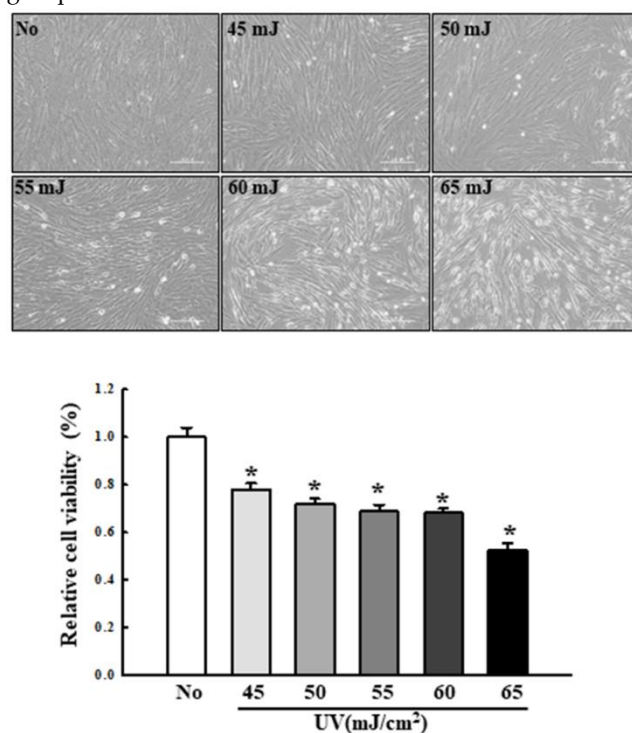

**Figure S2.** Cytotoxicity of MED. NHDF cells were exposed with three different doses of MED (100, 200 and 400 μg/mL) of MED for 24 h, and the morphological changes of cells were observed under a microscope at 400× magnification. The viability of these cells was determined with MTT assay. Two to three wells per group were used in the MTT assay, and optical density was measured in duplicates. Data are reported as the means ± SD.

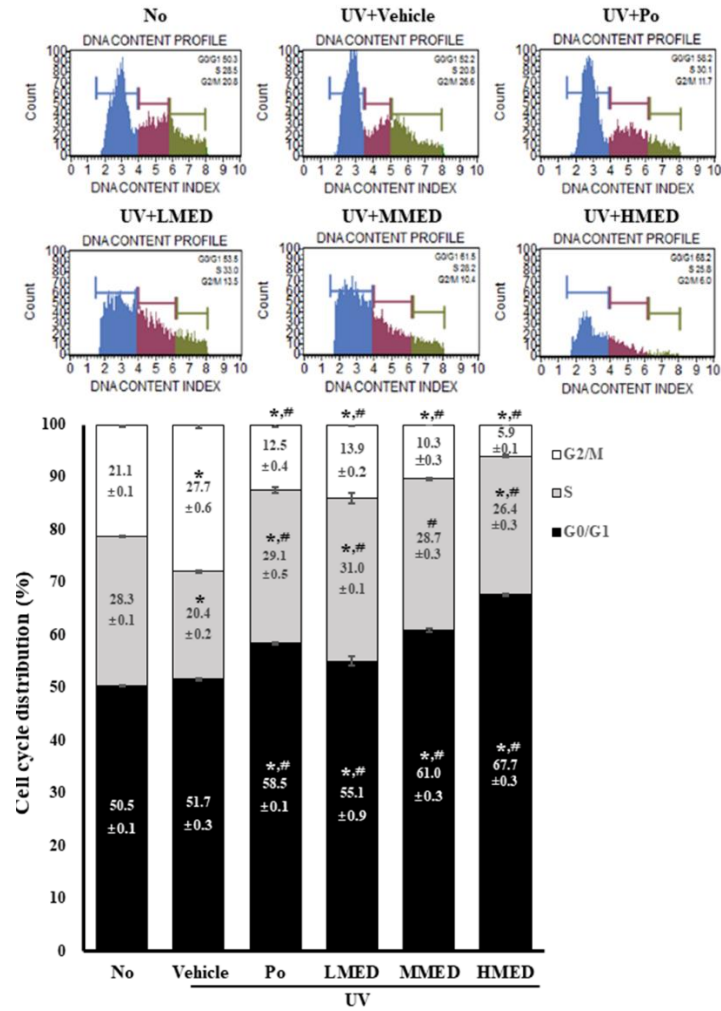

**Figure S3.** Cell cycle analysis of MED treated NHDF cells. After treatment with 100, 200 and 400 µg/mL MED for 24 h, the number of NHDF cells in the G0/G1, S and G2/M stages were analyzed. Two to three wells per group were used for PI staining, and the cell number in each phase was measured in duplicate. Data are reported as the mean ± SD. \*, p<0.05 compared to the No treated group. #, p<0.05 compared to the UV+Vehicle treated group.

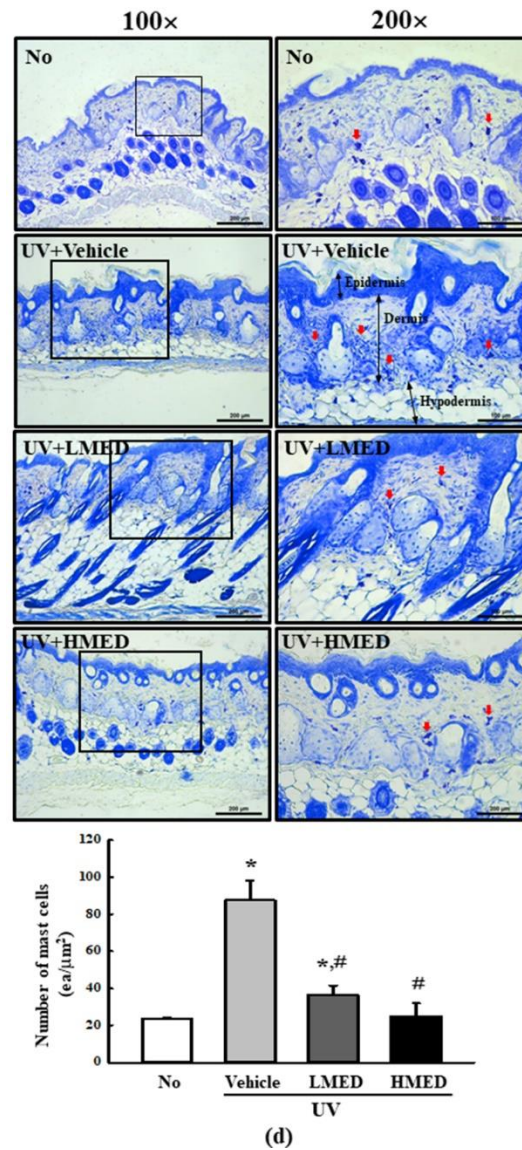

**Figure S4.** Infiltration of mast cells. Infiltration of mast cells was identified in the slide sections of ear tissue stained with toluidine blue, followed by observation at 400× magnification. Arrows indicate the infiltrated mast cells in the dermis of the ear tissue. Three to four mice per group were used in the preparation of tissue slides. Mast cell counting were analyzed in duplicate for each sample.

**Table S1.** Antibodies list for Western blot analyses.

| Name       | Cat. No. | Company                           |
|------------|----------|-----------------------------------|
| Anti-Bax   | Ab7977   | Abcam, Cambridge, UK              |
| Anti-Bcl-2 | Ab7973   | Abcam, Cambridge, UK              |
| Anti-Cas-3 | 9662     | Cell Signaling, Danvers, MA, USA  |
| Anti-actin | 4967     | Cell Signaling, Danvers, MA, USA  |
| Anti-Nrf2  | Ab137550 | Abcam, Cambridge, UK              |
| Anti-SOD   | Ab80946  | Abcam, Cambridge, UK              |
| Anti-ASC   | 67824    | Cell Signaling, Danvers, MA, USA  |
| Anti-Cas-1 | 24232    | Cell Signaling, Danvers, MA, USA  |
| Anti-NLRP3 | 15101    | Cell Signaling, Danvers, MA, USA  |
| Anti-iNOS  | PA3-030A | Thermo Fisher Scientific, MA, USA |
| Anti-Cox-2 | 4842     | Cell Signaling, Danvers, MA, USA  |
| Anti-MMP-9 | SC-13520 | Santa Cruz Biotechnology, CA, USA |
| Anti-MMP-2 | 87809    | Cell Signaling, Danvers, MA, USA  |

**Table S2.** Primer sequence for RT-PCR.

| <b>Primer name</b> | <b>Sequence (from 5' to 3')</b>   | <b>Product size (bp)</b> |
|--------------------|-----------------------------------|--------------------------|
| TNF- $\alpha$      |                                   |                          |
| Forward            | CCT GTA GCC CAC GTC GTA GC        | 374                      |
| Reverse            | TTG ACC TCA GCG CTG ACT TG        |                          |
| IL-6               |                                   |                          |
| Forward            | TTG GGA CTG ATG TTG TTG ACA       | 200                      |
| Reverse            | TCA TCG CTG TTG ATA CAA TCA GA    |                          |
| IL-1 $\beta$       |                                   |                          |
| Forward            | CAG TTC TGC CAT TGA CCA T         | 218                      |
| Reverse            | TCT CAC TGA A AC TCA GCC GT       |                          |
| NF- $\kappa$ B     |                                   |                          |
| Forward            | GTA ACA GCA GGA CCC AAG GA        | 501                      |
| Reverse            | AGC CCC TAA TAC ACG CCT CT        |                          |
| $\beta$ -actin     |                                   |                          |
| Forward            | TGG AAT CCT GTG GCA TCC ATG AAA C | 349                      |
| Reverse            | TAA AAC GCA GCT CAG TAA CAG TCC G |                          |
